# Supplementary material for: Laparoscopic Cytoreduction After Neoadjuvant Chemotherapy in High-Grade Epithelial Ovarian Cancer: A LANCE Randomized Clinical Trial
Source: PubMed Central journal article supplement (PMC11582931; doi:10.1001/jamanetworkopen.2024.46325), 2024-11-21
Supplement: jamanetwopen-e2446325-s003.pdf [file jamanetwopen-e2446325-s003.pdf]

## Data Sharing Statement

Rauh-Hain. Laparoscopic Cytoreduction After Neoadjuvant Chemotherapy in High-Grade Epithelial Ovarian Cancer. *JAMA Netw Open*. Published November 21, 2024.

doi:10.1001/jamanetworkopen.2024.46325

### Data

**Additional Information:** Trial registration: Laparoscopic Cytoreduction After Neoadjuvant Chemotherapy (LANCE) trial (NCT04575935): <https://clinicaltrials.gov/study/NCT04575935>;

**Data available:** No

### Additional Information

**Explanation for why data not available:** This is the feasibility phase of the study.
